# Supplementary material
Source: PubMed Central journal article supplement (PMC4302921)
Supplement: supp_dev.116467_DEV116467supp.pdf [file supp_dev.116467_DEV116467supp.pdf]

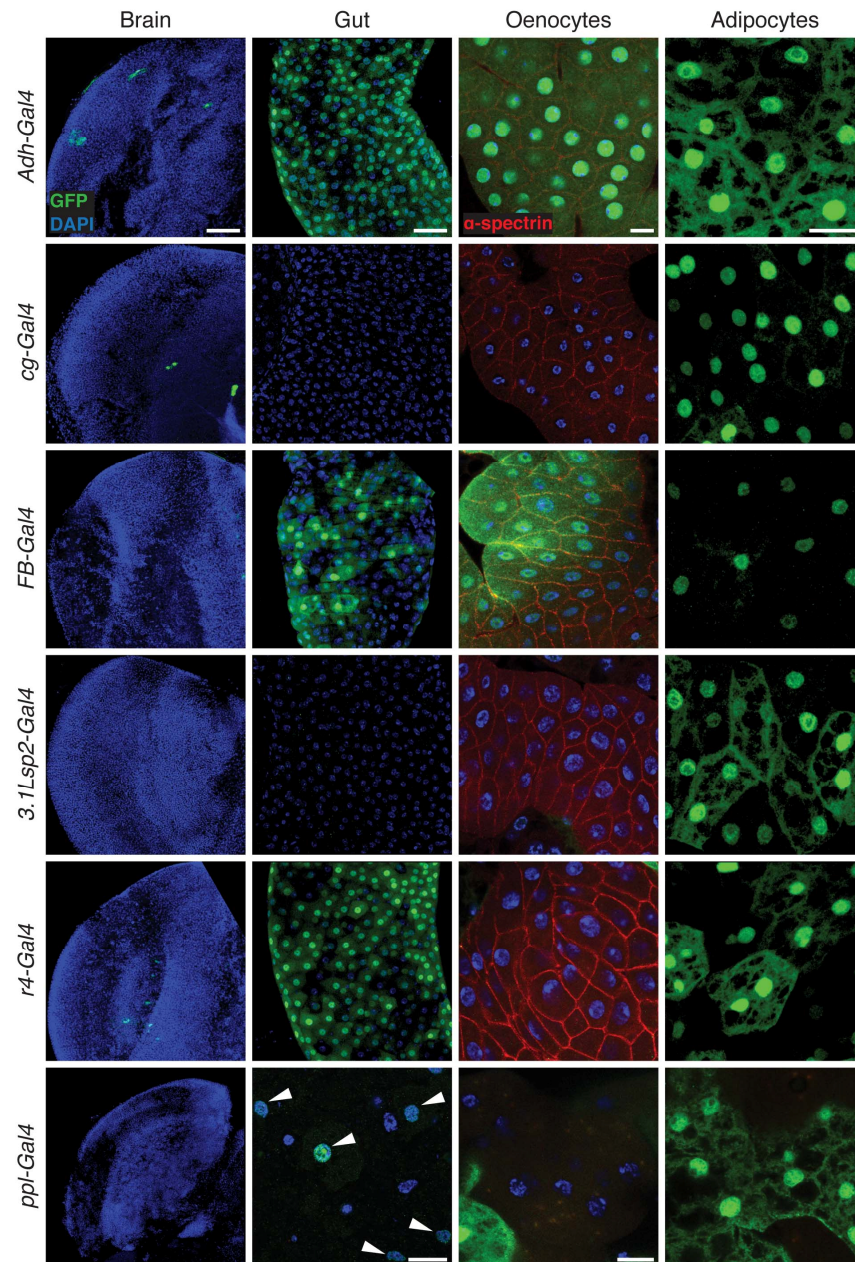

Supplemental Figure 1  
Armstrong, Laws and Drummond-Barbosa

**Fig. S1. In adult females, *3.1Lsp2-Gal4* is exclusively expressed in adipocytes.** Expression of *UAS-GFP* (green) induced by several larval and/or adult fat body Gal4 drivers in adult female tissues shows that only *3.1Lsp2-Gal4* is exclusively expressed in adipocytes. DAPI (blue) labels nuclei in brains, guts and oenocytes;  $\alpha$ -spectrin (red) labels cell membranes in

oenocytes (except in *ppl-Gal4*). Arrowheads indicate GFP-positive nuclei in the gut, for *ppl-Gal4*. Scale bars: 50  $\mu\text{m}$  (brains), 50  $\mu\text{m}$  (guts, for all except *ppl-Gal4*), 20  $\mu\text{m}$  (gut, for *ppl-Gal4*), 10  $\mu\text{m}$  (oenocytes), or 20  $\mu\text{m}$  (adipocytes).

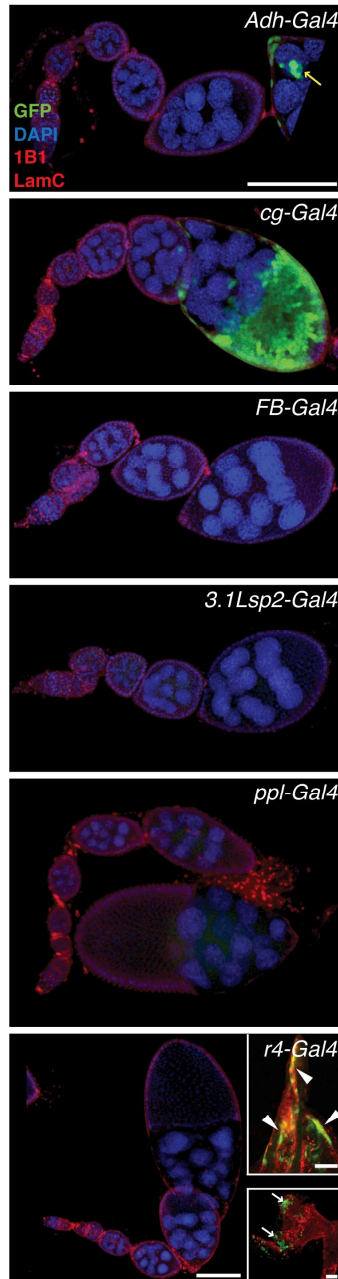

Supplemental Figure 2  
Armstrong, Laws and Drummond-Barbosa

**Fig. S2. *3.1Lsp2-Gal4* is not expressed in ovaries.**

Analysis of *UAS-GFP* (green) induced by fat body Gal4 drivers shown in Figure 1 in adult ovaries shows that *3.1Lsp2-Gal4* has no ovarian expression. *Adh-Gal4* is expressed late follicle cells, including border cells (yellow arrow), *cg-Gal4* is expressed in stage 10 and later

follicle cells, and *r4-Gal4* is expressed in late dorsal-anterior follicle cells (arrowheads) and oviduct (white arrows). DAPI (blue) labels nuclei; 1B1 (red) labels cell membranes; LamC (red) labels nuclear envelopes of a subset of terminally differentiated cells. Scale bars: 100  $\mu\text{m}$  (main panels), 50  $\mu\text{m}$  (top inset), 50  $\mu\text{m}$  (bottom inset).

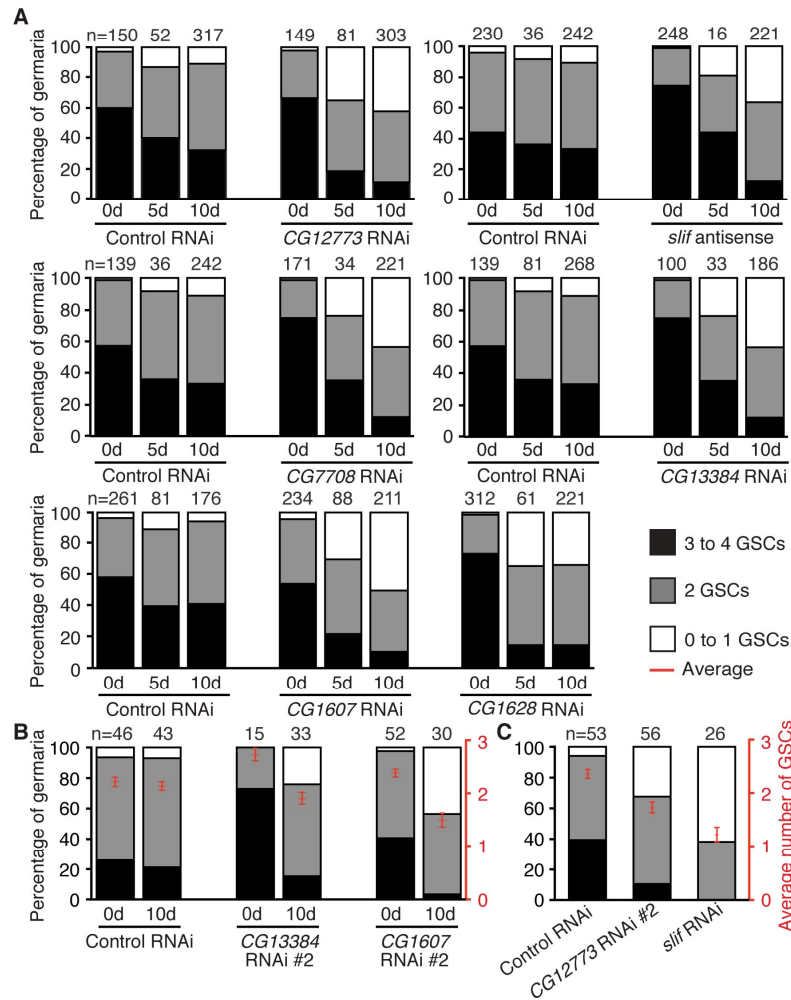

Supplemental Figure 3  
Armstrong, Laws, and Drummond-Barbosa

**Fig. S3. Reduced amino acid transport in adipocytes leads to higher rates of GSC loss in the ovary.**

(A-C) Frequencies of germaria containing zero-or-one, two, or three-or-four GSCs at different days after switch to 29°C for *Gal80<sup>ts</sup>*; *Lsp2*-mediated induction of a *UAS-slif*

*antisense* or *UAS-RNAi* transgenes against amino acid transporters *CG12773*, *CG7708*, *CG13384*, *CG1607*, *CG1628*, *CG12943* or *white* control. The same data used to calculate GSC number averages in Fig. 4 are plotted in (A). In (C), data at 10 days after switch to 29°C are shown. The reduction in average GSC numbers upon adipocyte inhibition of amino acid transport (Fig. 4) reflects an increased percentage of germaria showing zero-or-one GSC and decreased fraction retaining two or three-or-four GSCs. The right y-axis in (B,C) shows the average number of cap cells per germarium. Number of germaria analyzed is shown above each bar.

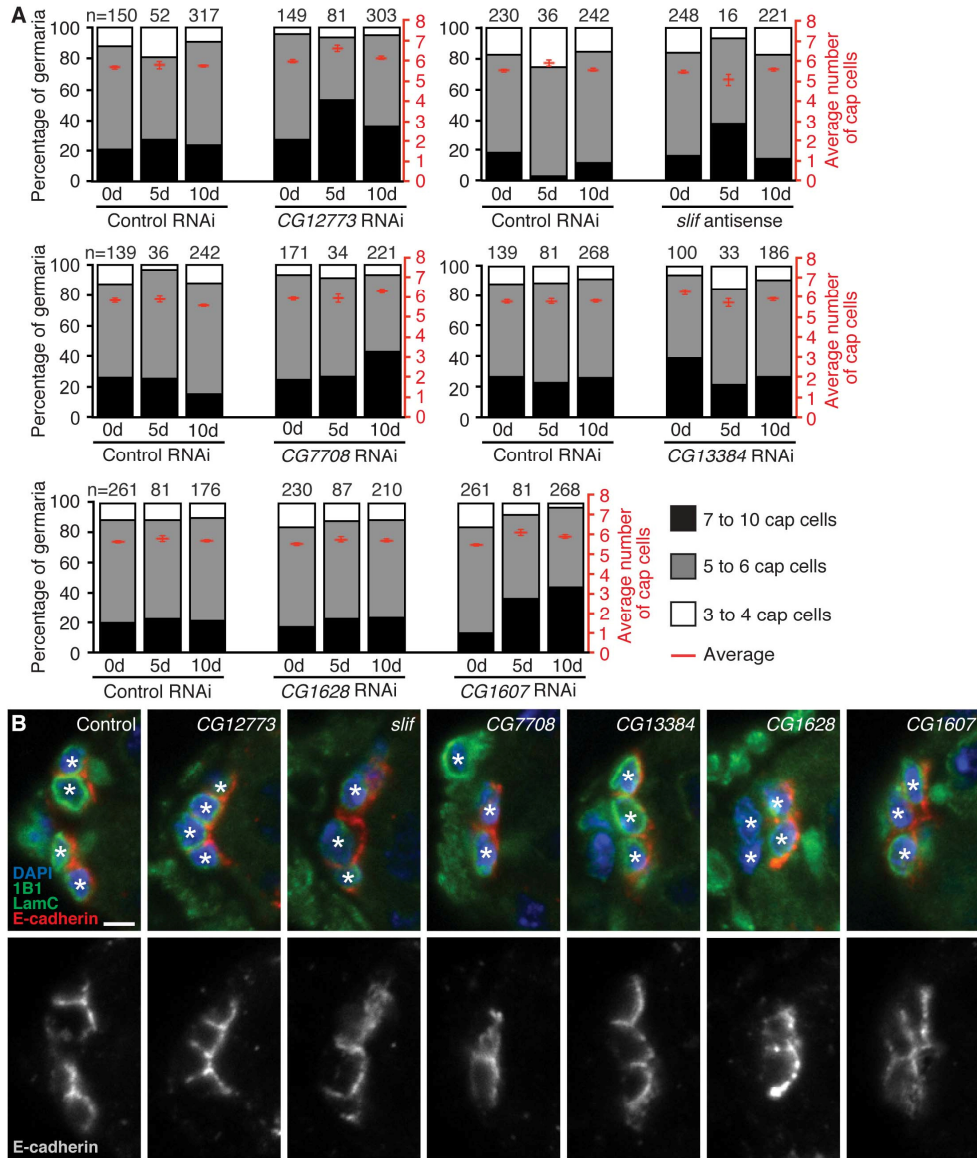

Supplemental Figure 4  
Armstrong, Laws, and Drummond-Barbosa

**Fig. S4. Reduced amino acid transport in adipocytes does not affect cap cell number or E-cadherin levels.**

(A) Frequencies of germaria containing three-or-four, five-or-six, or seven-to-10 cap cells (left y-axis), and average number of cap cells per germarium (right y-axis) at different days

after switch to 29°C for *Gal80<sup>ts</sup>*; *Lsp2*-mediated induction of a *UAS-slif antisense* or *UAS-RNAi* transgenes against amino acid transporters *CG12773*, *CG7708*, *CG13384*, *CG1607*, *CG1628*, *CG12943* or *white* control. Number of germaria analyzed is shown above each bar.

**(B)** Germaria from females at 10 days of adult adipocyte-specific knockdown of amino acid transporters or *white* control gene showing no obvious difference in levels of E-cadherin (red) at GSC-cap cell junctions. DAPI (blue) labels nuclei; 1B1 (green) labels fusomes; LamC (green) labels cap cell nuclear envelopes. Asterisks indicate cap cells. Scale bar, 2.5 μm.



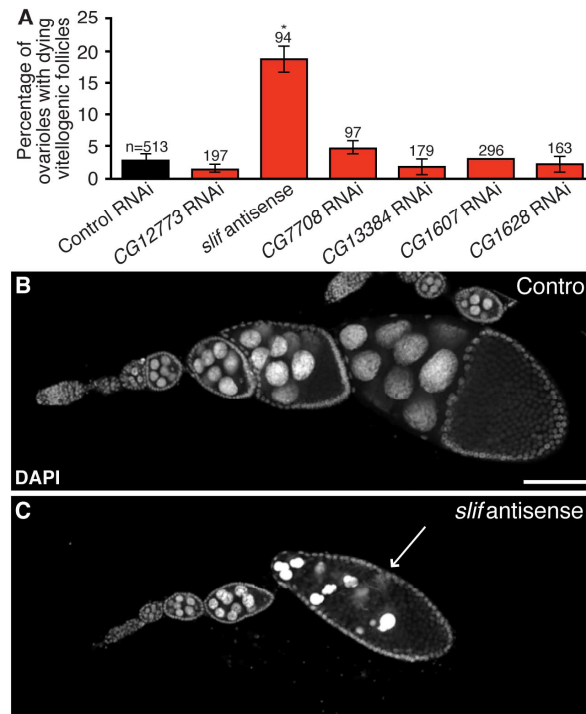

Supplemental Figure 5  
Armstrong, Laws and Drummond-Barbosa

**Fig. S5. Adult adipocyte-specific knockdown of amino acid transporters does not disrupt vitellogenesis, except in the case of *slif*.**

(A) Percentage of ovarioles containing dying vitellogenic follicles at 10 days of adipocyte knockdown of amino acid transporters. Number of ovarioles analyzed is shown above each bar. \* $P < 0.05$ , Student's  $t$  test. Error bars indicate mean  $\pm$  s.e.m. (B,C) DAPI-stained ovarioles from control (B) or *slif* (C) RNAi genotypes shown in (A). Arrow indicates degenerating follicle, recognized by the presence of pyknotic nuclei. Scale bar, 100  $\mu\text{m}$ .

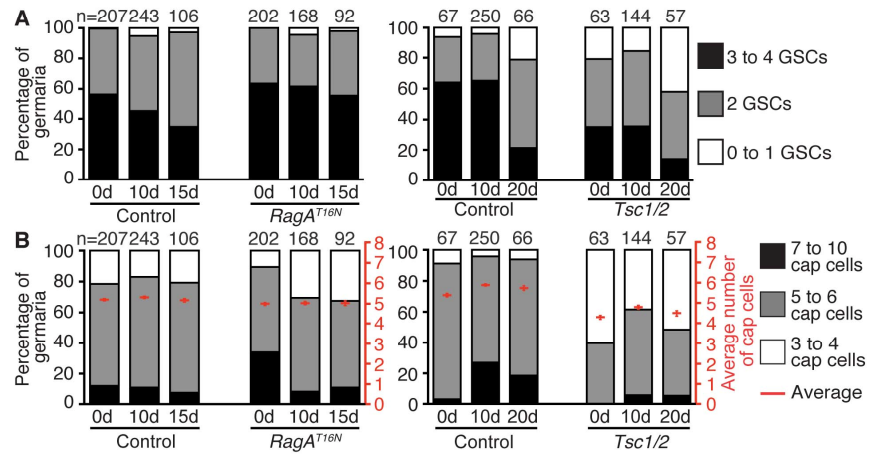

Supplemental Figure 6  
Armstrong, Laws, and Drummond-Barbosa

**Fig. S6. Reduced TOR signaling in adult adipocytes does not affect GSC or cap cell number.**

(A,B) Frequencies of germaria containing zero-or-one, two, or three-or-four GSCs (A), or three-or-four, five-or-six, or seven-to-ten cap cells (B) at different days after switch to 29°C

for *Gal80<sup>ts</sup>*; *Lsp2*-mediated induction of dominant negative *UAS-RagA<sup>T16N</sup>* or *UAS-Tsc1* and *UAS-Tsc2* (*Tsc1/2*) transgenes. The same data used to calculate GSC number averages in Fig. 6A are plotted in (A). The right y-axis in (B) shows the average number of cap cells per germarium. Number of germaria analyzed is shown above each bar.

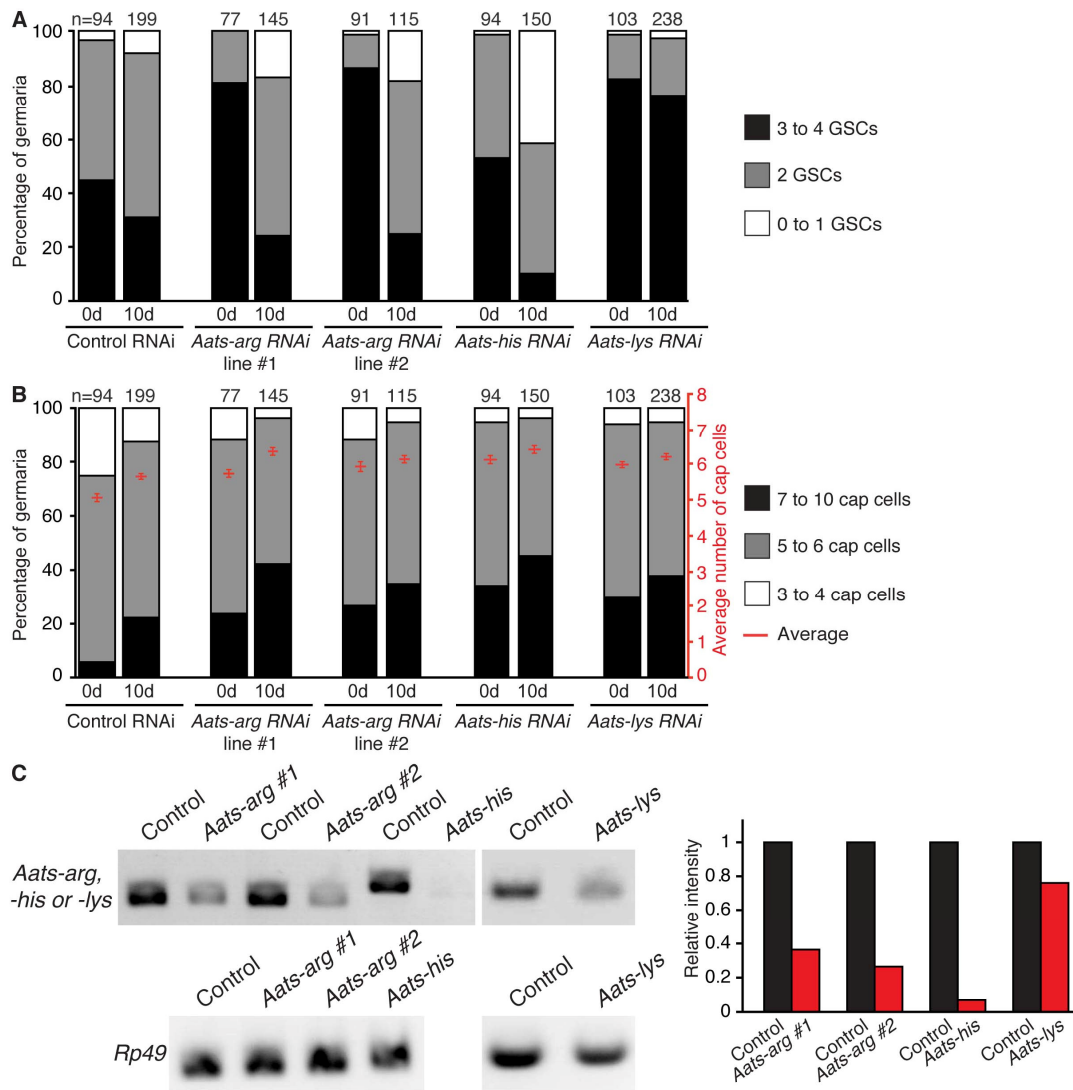

Supplemental Figure 7  
Armstrong, Laws and Drummond-Barbosa

**Fig. S7. Adult adipocyte-specific knockdown of aminoacyl-tRNA synthetases causes a reduction in GSC, but not cap cell, numbers.**

(A,B) Frequencies of germaria containing zero-or-one, two, or three-or-four GSCs (A), or three-or-four, five-or-six, or seven-to-10 cap cells (B) at zero or 10 days after switch to 29°C

for *Gal80<sup>ts</sup>*; *Lsp2*-mediated induction of *GFP* control, *Arginyl-tRNA synthetase* (*Aats-arg*), *Histidyl-tRNA synthetase* (*Aats-his*), or *Lysyl-tRNA synthetase* (*Aats-lys*) RNAi transgenes. The same data used to calculate GSC number averages in Fig. 7A are plotted in (A). The right y-axis in (B) shows the average number of cap cells per germarium. Number of germaria analyzed is shown above each bar. (C) RT-PCR analysis of hand-dissected fat bodies showing knockdown of amino acid transporters at 10 days of *Gal80<sup>ts</sup>*; *Lsp2*-mediated induction of RNAi transgenes against *aminoacyl-tRNA synthetases* or *GFP* control. Note that *Aats-lys* knockdown was relatively inefficient and did not alter GSC number.

**Table S1. Amino acid transporters tested in this study**

| AAT <sup>a</sup>           | Type <sup>b</sup>                                      | RNAi transgene #1                  | RNAi transgene #2 <sup>c</sup> | Fat body expression <sup>d</sup> |
|----------------------------|--------------------------------------------------------|------------------------------------|--------------------------------|----------------------------------|
| <i>CG1607</i> <sup>e</sup> | polyamine transporter                                  | <i>P{GD4651}v14925</i>             | <i>P{KK107364}VIE-260B</i>     | larval/adult                     |
| <i>CG1628</i>              | L-ornithine transporter                                | <i>P{KK108506}VIE-260B</i>         | <i>P{GD8885}v47475</i>         | adult                            |
| <i>CG4991</i>              | n.s. <sup>f</sup>                                      | <i>P{GD3406}v30263</i>             | -                              | -                                |
| <i>CG5535</i>              | cationic amino acid transporter                        | <i>P{KK100907}VIE-260B</i>         | -                              | -                                |
| <i>CG7255</i>              | cationic amino acid transporter                        | <i>P{KK110010}VIE-260B</i>         | -                              | -                                |
| <i>CG7708</i>              | proline:sodium symporter; choline transporter          | <i>P{KK109385}VIE-260B</i>         | <i>P{GD3648}v30302</i>         | -                                |
| <i>CG7888</i>              | n.s.                                                   | <i>P{GD2411}v37263</i>             | -                              | -                                |
| <i>CG8785</i>              | n.s.                                                   | <i>P{GD1961}v4650</i>              | -                              | -                                |
| <i>CG9413</i>              | polyamine transporter                                  | <i>P{KK101306}VIE-260B</i>         | -                              | -                                |
| <i>CG12531</i>             | polyamine transporter; cationic amino acid transporter | <i>P{KK109373}VIE-260B</i>         | -                              | -                                |
| <i>CG12773</i>             | sodium:potassium:chloride symporter                    | <i>P{KK102472}VIE-260B</i>         | <i>P{GD3189}v9899</i>          | larval/adult                     |
| <i>CG12943</i>             | n.s.                                                   | <i>P{KK112469}VIE-260B</i>         | -                              | -                                |
| <i>CG13248</i>             | polyamine transporter; cationic amino acid transporter | <i>P{KK103406}VIE-260B</i>         | -                              | -                                |
| <i>CG13384</i>             | n.s.                                                   | <i>P{KK102447}VIE-260B</i>         | <i>P{GD1007}v44246</i>         | adult                            |
| <i>CG13646</i>             | n.s.                                                   | <i>P{GD257}v1571</i>               | -                              | -                                |
| <i>CG13743</i>             | n.s.                                                   | <i>P{GD3488}v40974</i>             | -                              | -                                |
| <i>CG16700</i>             | GABA:hydrogen symporter                                | <i>P{GD3405}v45188</i>             | -                              | -                                |
| <i>CG17119</i>             | L-cystine transporter                                  | <i>P{GD3122}v51127</i>             | -                              | -                                |
| <i>CG30394</i>             | n.s.                                                   | <i>P{GD2127}v3470</i>              | -                              | -                                |
| <i>CG32079</i>             | n.s.                                                   | <i>P{KK107121}VIE-260B</i>         | -                              | -                                |
| <i>dmGlut</i>              | glutamate transporter                                  | <i>P{TRiP.HMS01615}attP2</i>       | -                              | larval                           |
| <i>kazachoc</i>            | potassium:chloride symporter activity                  | <i>P{TRiP.HMS01058}attP2</i>       | -                              | -                                |
| <i>minidiscs</i>           | polyamine transporter; leucine import                  | <i>P{GD453}v42485</i>              | -                              | adult <sup>g</sup>               |
| <i>Ncc69</i>               | sodium:potassium:chloride symporter                    | <i>P{KK108763}VIE-260B</i>         | -                              | -                                |
| <i>pathetic</i>            | n.s.                                                   | <i>P{KK104735}VIE-260B</i>         | -                              | larval                           |
| <i>slimfast</i>            | polyamine transporter; cationic amino acid transporter | <i>slif antisense</i> <sup>h</sup> | <i>P{GD12619}v45590</i>        | larval <sup>h</sup>              |

<sup>a</sup> AAT, amino acid transporter. The *Drosophila* genome encodes 40 predicted amino acid transporters; for 26 of them, RNAi lines were available ([www.flybase.org](http://www.flybase.org)).

<sup>b</sup> Type of amino acid transporter according to FlyBase annotation ([www.flybase.org](http://www.flybase.org)).

<sup>c</sup> The second set of RNAi lines target sequences that are different from those targeted by the first set ([stockcenter.vdrc.at](http://stockcenter.vdrc.at)).

<sup>d</sup> Fat body expression is listed as reported in FlyBase, except where indicated.

<sup>e</sup> The red font indicates amino acid transporters followed up on in this study.

<sup>f</sup> n.s., not specified.

<sup>g</sup> Adult fat body expression of *minidiscs* reported in Martin et al., 2000.

<sup>h</sup> Larval fat body expression of *slif* and *UAS-slif* antisense transgene described in Colombani et al., 2003.

**Table S2. Primers used for RT-PCR analyses**

| Gene            | Forward                                  | Reverse                                   |
|-----------------|------------------------------------------|-------------------------------------------|
| <i>CG1607</i>   | DDB788<br>(5'-AGTATCGGTGTGGCTGTATTG-3')  | DDB789<br>(5'-CTGGCAGAAGTTGTTGTGTATTT-3') |
| <i>CG12773</i>  | DDB763<br>(5'-CATGTTAATGCCCGACAG-3')     | DDB764<br>(5'-CATAGCTCTCGTCAGCGTC-3')     |
| <i>CG13384</i>  | DDB790<br>(5'-CTGGATCGGGAGATGATGAAAT-3') | DDB791<br>(5'-ACGCCACAAAGAGGAAGTAG-3')    |
| <i>Aats-arg</i> | DDB796<br>(5'-CCGAACGATCTGCTATCCTAAA-3') | DDB797<br>(5'-TCTTAGCCAGCTCCATTCC-3')     |
| <i>Aats-his</i> | DDB794<br>(5'-CCACATCGCCAAGGTCTATC-3')   | DDB795<br>(5'-ATCGAAGCTAACTCGCTTATCC-3')  |
| <i>Aats-lys</i> | DDB792<br>(5'-GGCTCCTACAAGGTCATCTATC-3') | DDB793<br>(5'-GGTATACGCGTTGCAAATCTC-3')   |
| <i>Gcn2</i>     | DDB811<br>(5'-ACACTGGCCCTAAGCCAATC-3')   | DDB812<br>(5'-GCCTTGCTGGTGAATATGCG-3')    |
| <i>Rp49</i>     | DDB137<br>(5'-CAGTCGGATCGATATGCTAAGC-3') | DDB138<br>(5'-AATCTCCTTGCCTTCTTGG-3')     |
